# Supplementary material
Source: PubMed Central journal article supplement (PMC8869849)
Supplement: NIHMS1044240-supplement-Supplemental_Table_2.pdf [file NIHMS1044240-supplement-Supplemental_Table_2.pdf]

Supplementary Table 2

*Correlations of Psychological Distress at T2 with Psychological Distress at T1 and Communication at T2*

|                           | Depression<br>Men T2 | Depression<br>Women T2 | Anxiety<br>Men T2 | Anxiety<br>Women T2 | PTSD<br>Men T2 | PTSD<br>Women T2 |
|---------------------------|----------------------|------------------------|-------------------|---------------------|----------------|------------------|
| Depression<br>Men T1      | .63***               | .16***                 | .61***            | .10                 | .62***         | .13              |
| Depression<br>Women T1    | .16*                 | .61***                 | .14               | .50***              | .10            | .58***           |
| Anxiety<br>Men T1         | .65***               | .19*                   | .72***            | .14                 | .61***         | .17*             |
| Anxiety<br>Women T1       | .15*                 | .51***                 | .16*              | .65***              | .10            | .60***           |
| PTSD<br>Men T1            | .63***               | .14                    | .66***            | .01                 | .75***         | .05              |
| PTSD Women<br>T1          | .16*                 | .48***                 | .16*              | .40***              | .12            | .67***           |
| Communication<br>Men T2   | -.06                 | -.12                   | -.05              | -.05                | -.15           | -.25**           |
| Communication<br>Women T2 | -.15*                | -.01                   | -.06              | -.02                | -.07           | -.28***          |

Note: \* $p = .05$ , \*\* $p < .01$ , \*\*\* $p < .001$
